# Supplementary material
Source: publisher figshare collection journal article supplement (https://karger.figshare.com/articles/dataset/_/6741482)
Supplement: Supplementary file 1 [file 1]

## Supplementary material

### 1. Estimation of dynamic component of trunk acceleration, $a_D$ (in gravity units, $1g=9.8m/s^2$ ):

$a_D = \left| \sqrt{a_x^2 + a_y^2 + a_z^2} - 1 \right|$ , where  $a_x, a_y, a_z$  are acceleration components at the 3-dimensional axes of sensor frame.

### 2. Definition of multivariate PA pattern. Information related to *type*, *duration* and *intensity* is combined to define 25 multivariate PA states, as follows:

If *Type=Non-Locomotion*, divide each detected period in epochs of 1second length. For each epoch calculate movement *intensity* as the mean value of dynamic component of trunk acceleration,  $mean(a_D)$ , then assign to each epoch a PA state according to the value of  $mean(a_D)$ , as indicated in Table 1S.

If *Type=Locomotion*, assign to each second of the respective period a PA state, according to locomotion *duration* (s) and *intensity* expressed in terms of *cadence* (steps/min), as indicated in Table 1S

**Table 1S: Mapping of PA dimensions into multivariate PA states; each PA state has assigned a numerical code and a color for pattern visualization.**

| Type                   | Duration                             | Intensity                             | Multivariate PA states |
|------------------------|--------------------------------------|---------------------------------------|------------------------|
| If Type=Non-locomotion |                                      | & $mean(a_D) \leq 0.1$ (verylow)      | 1                      |
|                        |                                      | & $0.1 < mean(a_D) \leq 0.2$ (low)    | 2                      |
|                        |                                      | & $0.2 < mean(a_D) \leq 0.4$ (medium) | 3                      |
|                        |                                      | & $0.4 < mean(a_D) \leq 0.6$ (high)   | 4                      |
|                        |                                      | & $mean(a_D) > 0.6$ (very high)       | 5                      |
| If Type=Locomotion     | & $duration \leq 30$ (very short)    | & $cadence \leq 70$ (very slow)       | 6                      |
|                        |                                      | & $70 < cadence \leq 90$ (slow)       | 7                      |
|                        |                                      | & $90 < cadence \leq 110$ (moderate)  | 8                      |
|                        |                                      | & $110 < cadence \leq 130$ (fast)     | 9                      |
|                        |                                      | & $cadence > 130$ (very fast)         | 10                     |
|                        | & $30 < duration \leq 120$ (short)   | & $cadence \leq 70$ (very slow)       | 11                     |
|                        |                                      | & $70 < cadence \leq 90$ (slow)       | 12                     |
|                        |                                      | & $90 < cadence \leq 110$ (moderate)  | 13                     |
|                        |                                      | & $110 < cadence \leq 130$ (fast)     | 14                     |
|                        |                                      | & $cadence > 130$ (very fast)         | 15                     |
|                        | & $120 < duration \leq 360$ (medium) | & $cadence \leq 70$ (very slow)       | 16                     |
|                        |                                      | & $70 < cadence \leq 90$ (slow)       | 17                     |
|                        |                                      | & $90 < cadence \leq 110$ (moderate)  | 18                     |
|                        |                                      | & $110 < cadence \leq 130$ (fast)     | 19                     |
|                        |                                      | & $cadence > 130$ (very fast)         | 20                     |
|                        | & $duration > 360$ (long)            | & $cadence \leq 70$ (very slow)       | 21                     |
|                        |                                      | & $70 < cadence \leq 90$ (slow)       | 22                     |
|                        |                                      | & $90 < cadence \leq 110$ (moderate)  | 23                     |
|                        |                                      | & $110 < cadence \leq 130$ (fast)     | 24                     |
|                        |                                      | & $cadence > 130$ (very fast)         | 25                     |

### 3. Complexity analysis (Lempel-Ziv and Permutation Lempel-Ziv computation)

- a) Theoretical background for computation of LZC can be found in (1); additional information and Matlab routine for calculation of LZC metric can be found in (2) and downloaded online (accessed 17<sup>th</sup> Oct 2017)

([http://www.gao.ece.ufl.edu/GCTH\\_Wileybook/programs/LZ\\_complexity/LZ\\_complexity.m](http://www.gao.ece.ufl.edu/GCTH_Wileybook/programs/LZ_complexity/LZ_complexity.m))

- b) Theoretical background and Matlab routine for computation of PLZC metric can be found in (3).  
c) Principle of LZC and PLZC computation:

LZC is a non-parametric measure of complexity applied directly to analyze the PA pattern represented as a symbolic sequence (i.e., succession of PA states coded with discrete values from 1 to 25).

PLZC( $m, t$ ) is a parametric measure of complexity implying two steps:

1. Generate a permutation/ordinal pattern from the original symbolic sequence (PA pattern) by comparison of  $m$  consecutive PA states, separated in time by a lag  $t > 1$ . Detailed description of ordinal patterns generation for different parameters  $m$  and  $t$  is provided in (4).
2. Apply LZC to the ordinal pattern obtained according to selected parameters ( $m, t$ ).

Since the parameters of PLZC computation can affect its output, we investigated the results for different values of  $m$  and  $t$ . The analysis showed relatively stable complexity values for wide range of values chosen for  $m$  and  $t$  ( $m=4$  to 7,  $t=10$  to 30), Table 2S. The optimal combination in terms of discriminative properties and computational efficiency appeared  $m=4$  and  $t=10$ .

### 4. Supplementary results

Table 2S: Comparative values of LZC and PLZC( $m, t$ ) obtained with various computational parameters.

| Complexity metrics | Fully confident | Less confident | p-value | Effect size (Cliff's delta) |
|--------------------|-----------------|----------------|---------|-----------------------------|
| LZC                | 0.27±0.04       | 0.23±0.04      | 0.003   | 0.56                        |
| PLZC(4,10)         | 0.4±0.07        | 0.3±0.06       | 0.001   | 0.62                        |
| PLZC(4,15)         | 0.43±0.09       | 0.33±0.05      | 0.004   | 0.54                        |
| PLZC(4,20)         | 0.44±0.09       | 0.34±0.05      | 0.006   | 0.52                        |
| PLZC(4,30)         | 0.45±0.09       | 0.35±0.06      | 0.005   | 0.53                        |
| PLZC(7,10)         | 0.3±0.05        | 0.24±0.04      | 0.001   | 0.61                        |
| PLZC(7,15)         | 0.32±0.06       | 0.26±0.04      | 0.005   | 0.53                        |
| PLZC(7,20)         | 0.33±0.07       | 0.26±0.04      | 0.007   | 0.51                        |
| PLZC(7,30)         | 0.34±0.07       | 0.27±0.04      | 0.006   | 0.52                        |

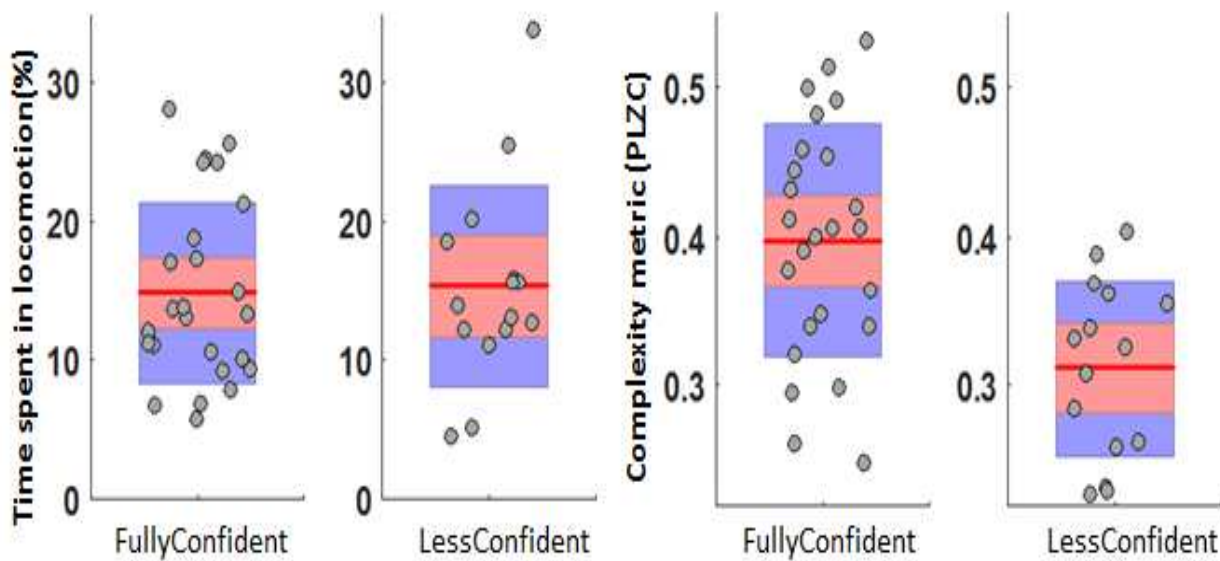

Fig. 1S: Illustration of discriminative properties of *time spent in locomotion* (%) and *complexity* of PA patterns (quantified with *PLZC*). The graphs shows the group mean (red line), standard deviation (blue shadow), as well as the values corresponding to the subjects in each group.

## References

- 1 Aboy M, Hornero R, Abásolo D, Álvarez D. Interpretation of the Lempel-Ziv complexity measure in the context of biomedical signal analysis. *IEEE Transactions on biomedical Engineering*. 2006;53(11):2282-8.
- 2 Gao J, Cao Y, Tung W-w, Hu J. Multiscale analysis of complex time series: integration of chaos and random fractal theory, and beyond: John Wiley & Sons; 2007.
- 3 Bai Y, Liang Z, Li X, Voss LJ, Sleight JW. Permutation Lempel–Ziv complexity measure of electroencephalogram in GABAergic anaesthetics. *Physiological Measurement*. 2015;36(12):2483.
- 4 Parlitz U, Berg S, Luther S, Schirdewan A, Kurths J, Wessel N. Classifying cardiac biosignals using ordinal pattern statistics and symbolic dynamics. *Computers in biology and medicine*. 2012;42(3):319-27.
